# Supplementary material for: A long-term stable thermochromic smart window of PNIPAM-based hydrogels with excellent water retention and visible light modulation
Source: Royal Society of Chemistry journal article supplement (doi:10.1039/d5ta09352j), 2026-01-01
Supplement: d5ta09352j1.pdf [file d5ta09352j1.pdf]

## Supporting Information

### **A long-term stable thermochromic smart window of PNIPAM-based hydrogels with excellent water retention and visible light modulation**

*Xin Li<sup>a,1</sup>, Xianglei Bu<sup>a,1</sup>, Jie Huang<sup>a</sup>, Ying Li<sup>a,\*</sup>, Likui Wang<sup>a</sup>, Hongyan Miao<sup>a</sup>, Gang Shi<sup>a,b,\*</sup>*

*<sup>a</sup>The Key Laboratory of Synthetic and Biotechnology Colloids, Ministry of Education, School of Chemical and Material Engineering, Jiangnan University, 1800 Lihu Avenue, Wuxi, 214122, China*

*<sup>b</sup>University of Xizang Medicine, Lhasa, 850000, PR China*

#### ***\*Corresponding Authors:***

*Email: liying@jiangnan.edu.cn (Y. Li); gangshi@jiangnan.edu.cn (G. Shi).*

*<sup>1</sup>Xin Li and Xianglei Bu are contributed equally.*

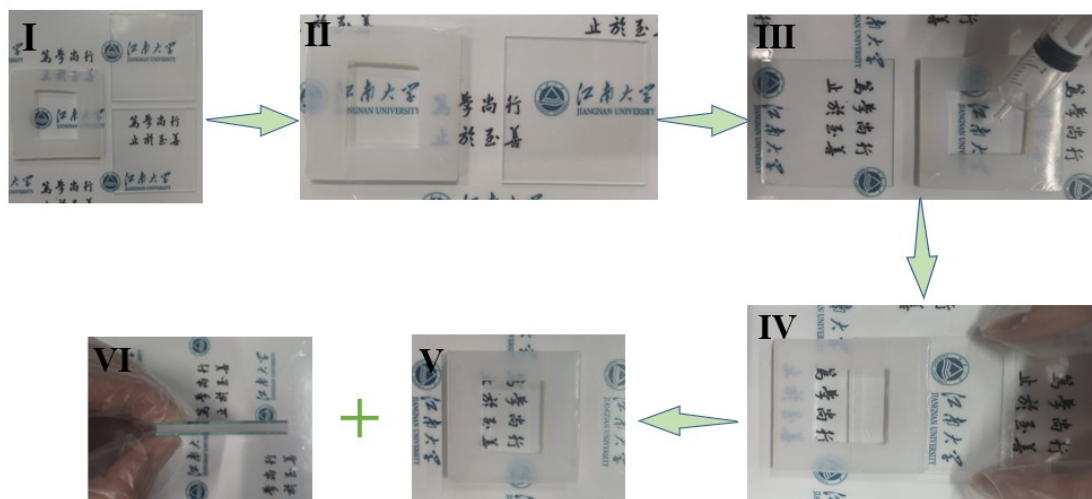

**Fig. S1** Photograph of the process of fabricating the smart window

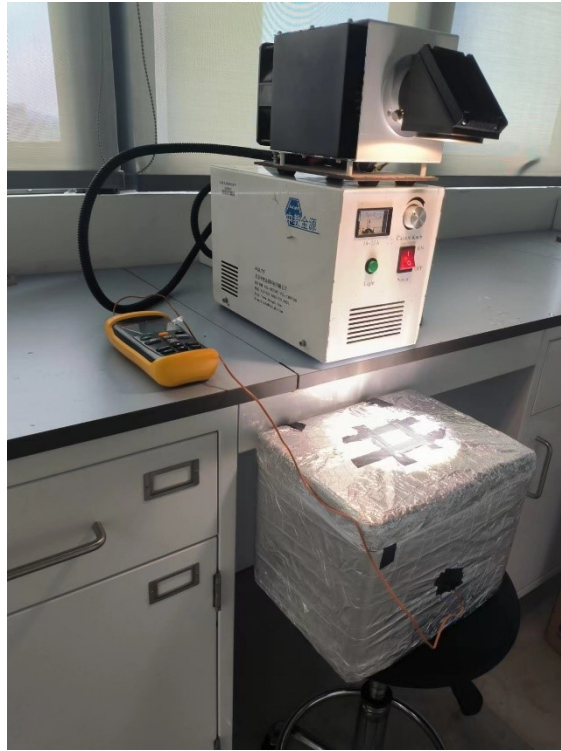

**Fig. S2** Photograph of the indoor experiment system.

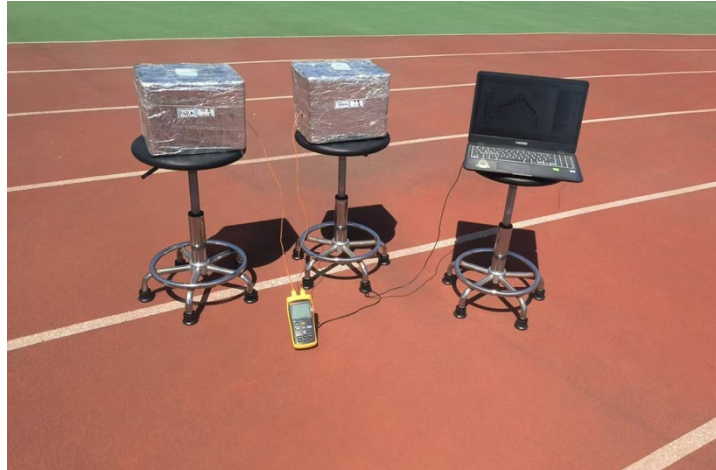

**Fig. S3** Photograph of the outdoor experiment system.

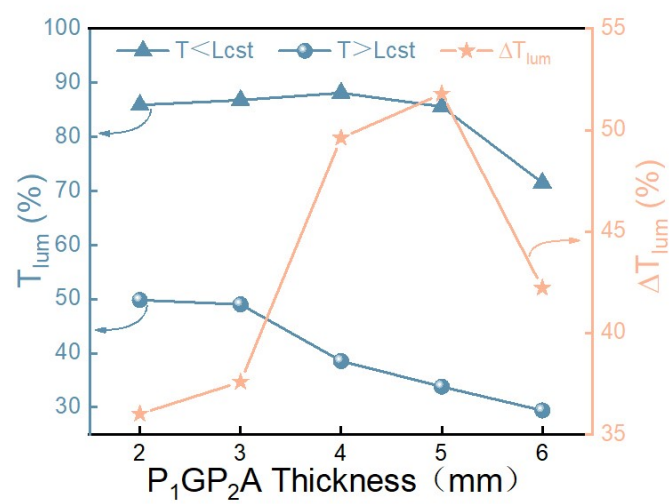

**Fig. S4**  $T_{lum}$  before and after phase transition and  $\Delta T_{lum}$  of the  $P_1GP_2A$  smart windows with different thickness hydrogels.

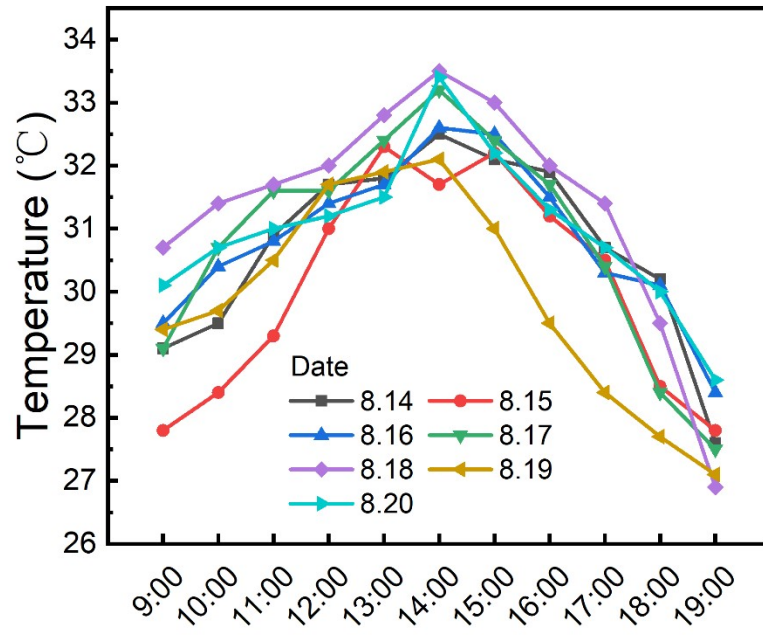

**Fig. S5** Air temperature curves for the outdoor experiment in Yixing, Jiangsu, China, August 14-20, 2025, 9:00-19:00.
